# Supplementary material for: Peroxidase-like activity of biosynthesized silver nanoparticles for colorimetric detection of cysteine
Source: Royal Society of Chemistry journal article supplement (doi:10.1039/d3ra01587d), 2023-01-01
Supplement: d3ra01587d1.pdf [file d3ra01587d1.pdf]

## Peroxidase-like activity of biosynthesized silver nanoparticles for colorimetric detection of cysteine

Melisew Tadele Alula\*

Department of Chemical and Forensic Sciences, Faculty of Science, Botswana International  
University of Science and Technology, Plot 10071, Private Bag 16, Palapye, Botswana

### Supplementary data

**Table S1.** Qualitative phytochemical screening of leaves extract of *Sclerocarya birrea*

| No | Secondary Metabolites | Type of test         | Observation                                          | Result   |
|----|-----------------------|----------------------|------------------------------------------------------|----------|
| 1  | Steroids              | Salkowski test       | Brown precipitate upon standing                      | Positive |
| 2  | Terpenoids            | Salkowski test       | Reddish brown precipitate and golden yellow solution | Positive |
| 3  | Saponins              | Foam test            | Foam formation after 15 minutes                      | Positive |
| 4  | Alkaloids             | Wagner's test        | Yellow solution observed- no white precipitate       | Negative |
| 5  | Sugars                | Benedict's test      | Orange-brick red precipitate was formed              | Positive |
| 6  | Flavonoids            | Ammonium test        | Appearance of yellow color at ammonia layer          | Positive |
| 7  | Tannins               | Ferric chloride test | Black precipitate formed immediately                 | Positive |
| 8  | Phenols               | Ferric chloride test | No green or blue color was observed                  | Negative |

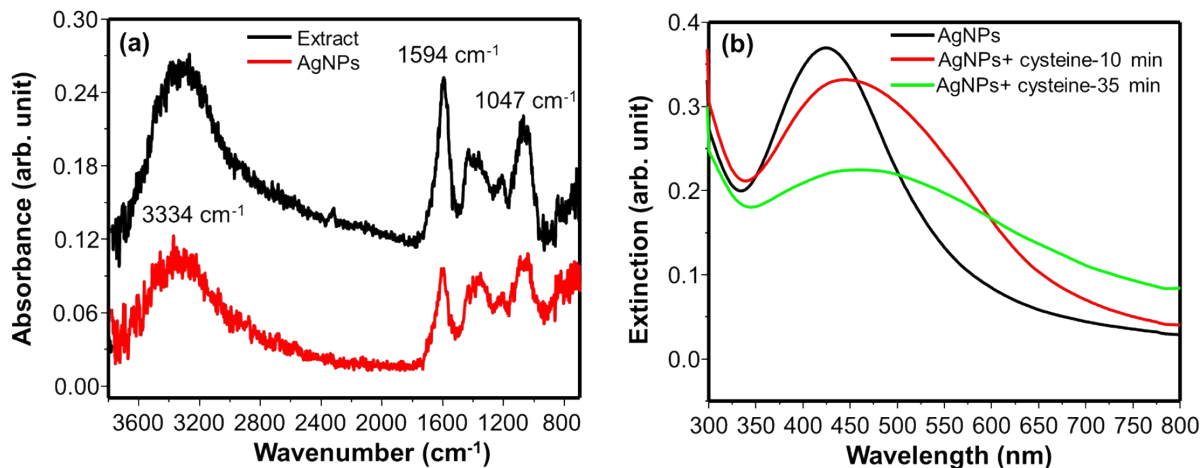

**Fig. S1** (a) FTIR spectra of the *Sclerocarya birrea* (Morula) leaves aqueous extract and the synthesized AgNPs obtained using ATR mode. (b) Extinction spectrum of AgNPs colloids and AgNPs colloids mixed with 100  $\mu\text{M}$  cysteine for 10 and 35 min.

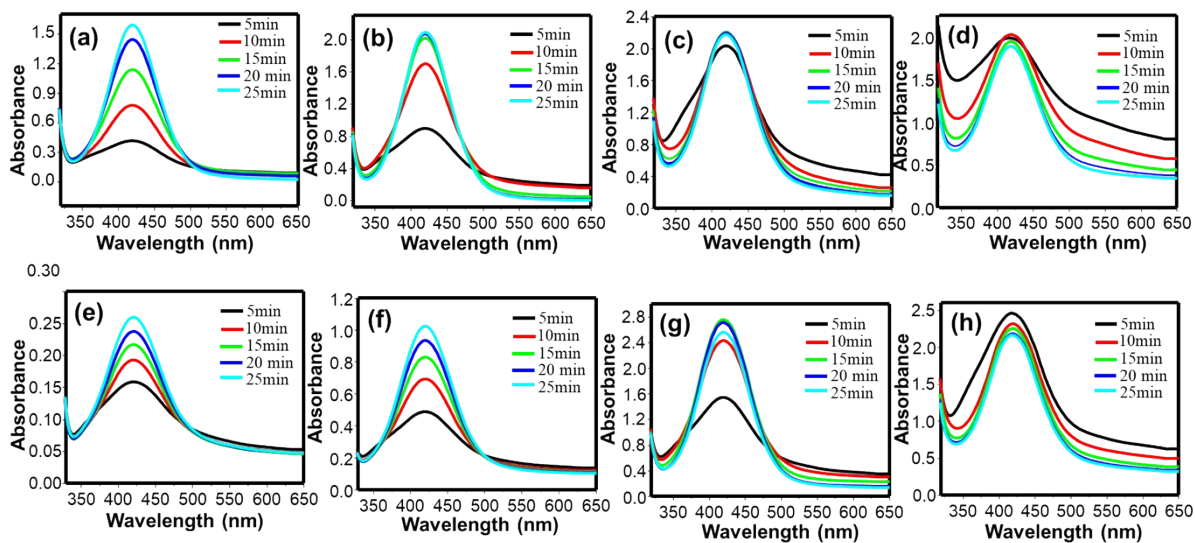

**Fig. S2** Spectra of DAP in the absence of cysteine using different volume of AgNPs (a) 10  $\mu\text{L}$  (b) 25  $\mu\text{L}$  (c) 50  $\mu\text{L}$  and (d) 75  $\mu\text{L}$  and in the presence of cysteine using different volume of AgNPs (e) 10  $\mu\text{L}$  (f) 25  $\mu\text{L}$  (g) 50  $\mu\text{L}$  (h) 75  $\mu\text{L}$ .
